# Supplementary material for: Uromodulin p.Cys147Trp mutation drives kidney disease by activating ER stress and apoptosis
Source: JCI journal article supplement (doi:10.1172/jci93817), 2017-10-08
Supplement: sd1 [file 1]

## **Supplemental Data**

### **Uromodulin p.Cys147Trp mutation causes kidney disease by ER-stress/TNF-mediated apoptosis**

Bryce G. Johnson<sup>1,2</sup>, Lan T. Dang<sup>1</sup>, Graham Marsh<sup>1</sup>, Allie M. Roach<sup>1,2</sup>,  
Zebulon G. Levine<sup>1</sup>, Anthony Monti<sup>1</sup>, Deepak Reyon<sup>1</sup>, Lionel Feigenbaum<sup>1\*</sup>  
& Jeremy S. Duffield<sup>1,2,3 \*</sup>

#### **1. Supplemental Figures**

#### **2 .Supplemental Tables**

#### **3. Supplemental Experimental Procedures**

#### **4 .Supplemental References**

# 1. Supplemental Figures:

**Figure S1**

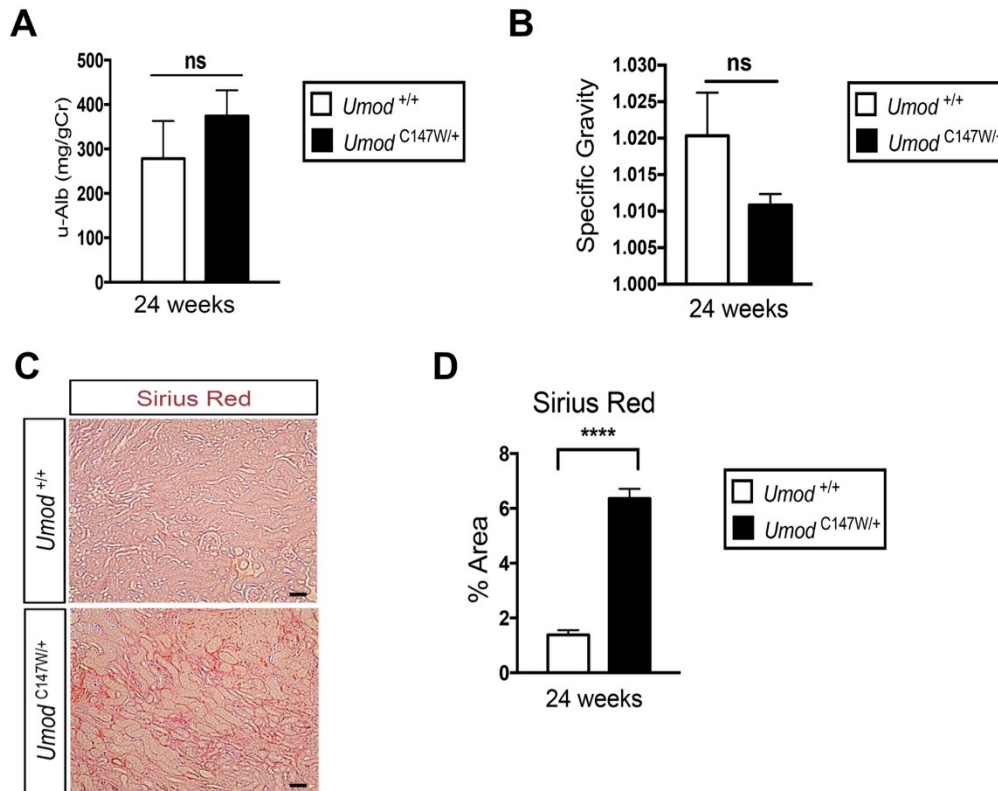

**Figure S1. *Umod*<sup>C147W/+</sup> mice exhibit mild proteinuria and severe tissue fibrosis.**

(A) Urinary albumin (u-Alb) quantified from 24-week-old mice. (B) Specific gravity measured in urine of 24-week-old mice. (C) Histological images of whole kidney sections (4μm) stained with Picrosirius red preparation (collagens I/III in red). Images taken at 10X. (D) Quantification of Picrosirius Red images. Data are represented as mean ± SEM. \*P<0.05, \*\*P<0.01, \*\*\*P<0.001, \*\*\*\*P<0.0001. Student's t-test. n = 6–8 per group. (Scale bars, 50 μm.)

**Figure S2**

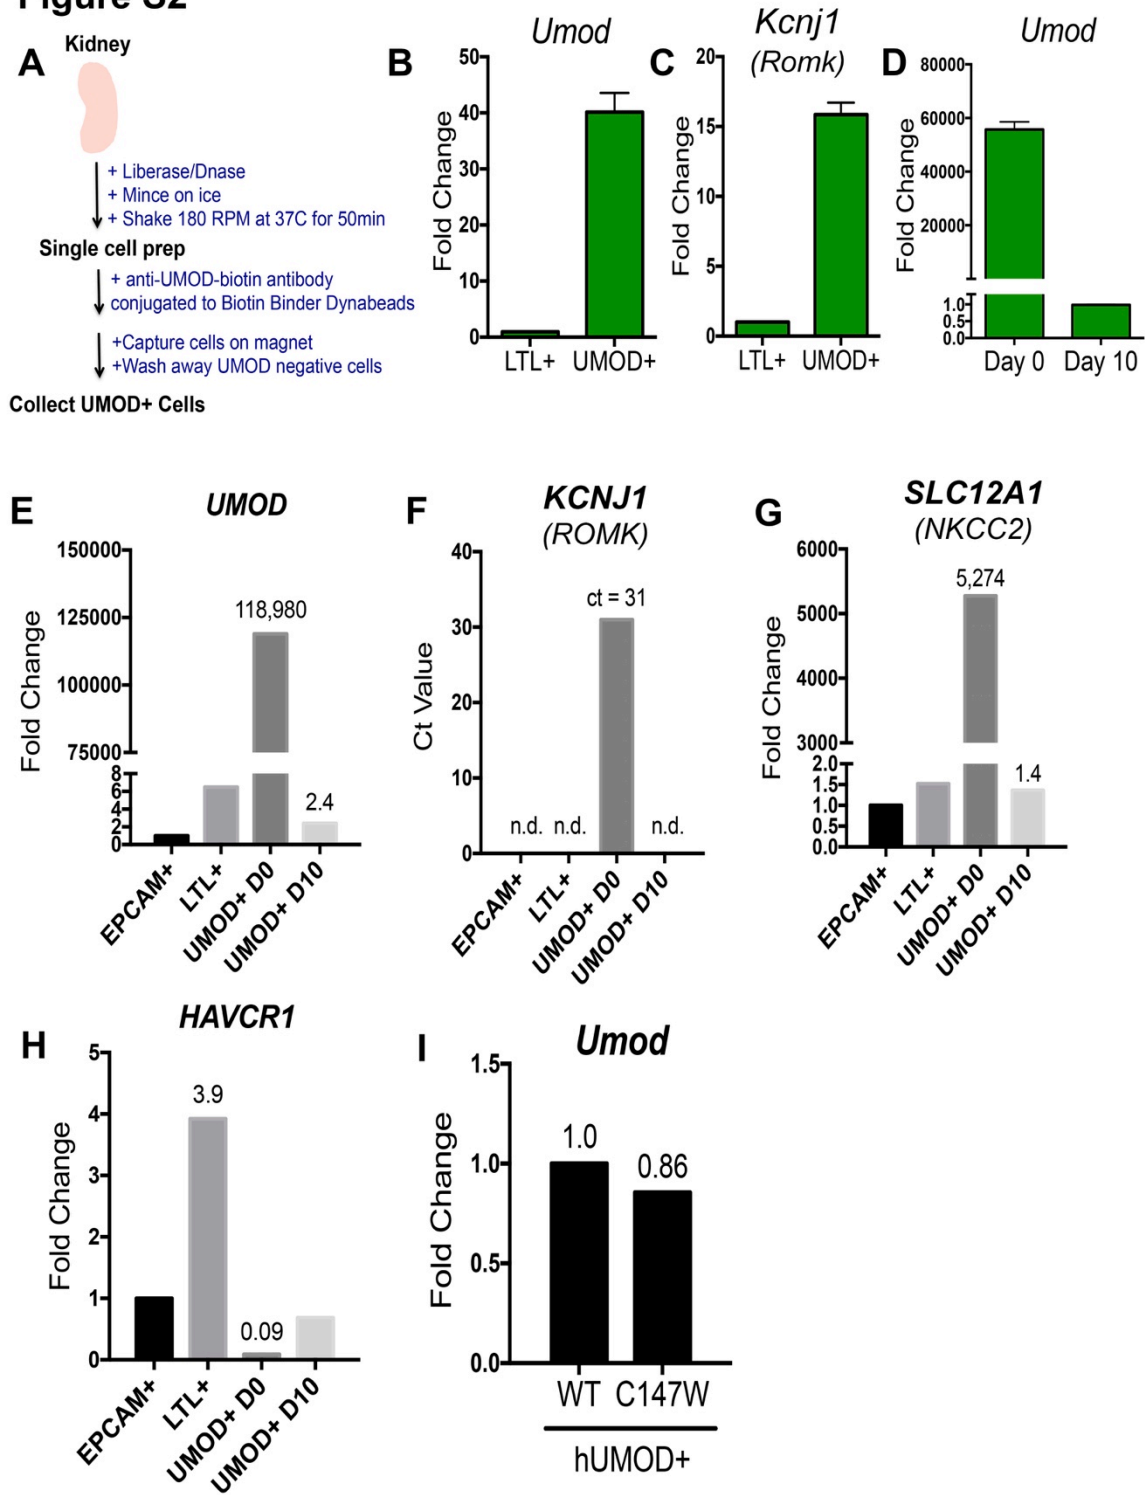

**Figure S2. Isolation of primary Uromodulin producing epithelial cells.**

(A) Schema for UMOD producing cell isolation procedure using Biotin Binder Dynabeads. (B-C) Quantification by q-PCR of gene expression in Day 0 UMOD producing cell fraction and proximal LTL+ cell fraction from whole kidney isolate of 6-week-old *Umod*  $+/+$  mouse. (B) *Umod* expression. (C) *Romk* expression. (D) Quantitative PCR of *Umod* expression in isolated, murine UMOD producing cells at Day 0 and Day10 post isolation from whole kidney. Note loss of *Umod* expression in Day 10 cells. (E-H) Quantification by q-PCR of gene expression in EPCAM+, LTL+, and UMOD producing Day 0 and Day 10 isolated cell fractions from human kidney isolate. Isolation of each cell type was performed sequentially from the same donor tissue, starting with UMOD, followed by EPCAM and then LTL. (E) *UMOD* expression. Note enrichment in UMOD producing Day 0 fraction, and drastic loss by Day 10. (F) *ROMK* expression reported as Ct value. Note no detection (n.d.) was observed after 40 cycles for EPCAM+, LTL+, and UMOD producing Day 10 isolates. (G) *NKCC2* expression. Note reduced expression in UMOD producing cells by Day 10. (H) *HAVCR1* (KIM1) expression. Note enrichment in proximal tubule LTL+ fraction. (I) Quantitative PCR of Uromodulin expression in human cell lines generated with lenti viral vectors harboring coding sequences for either the wild type or p.Cys147Trp mutant forms of Uromodulin. Note comparable expression levels. Representative data from 1 of 3 (B-D) or 1 of 4 (E-I) experiments are shown. n = 3-4 per group.

**Figure S3**

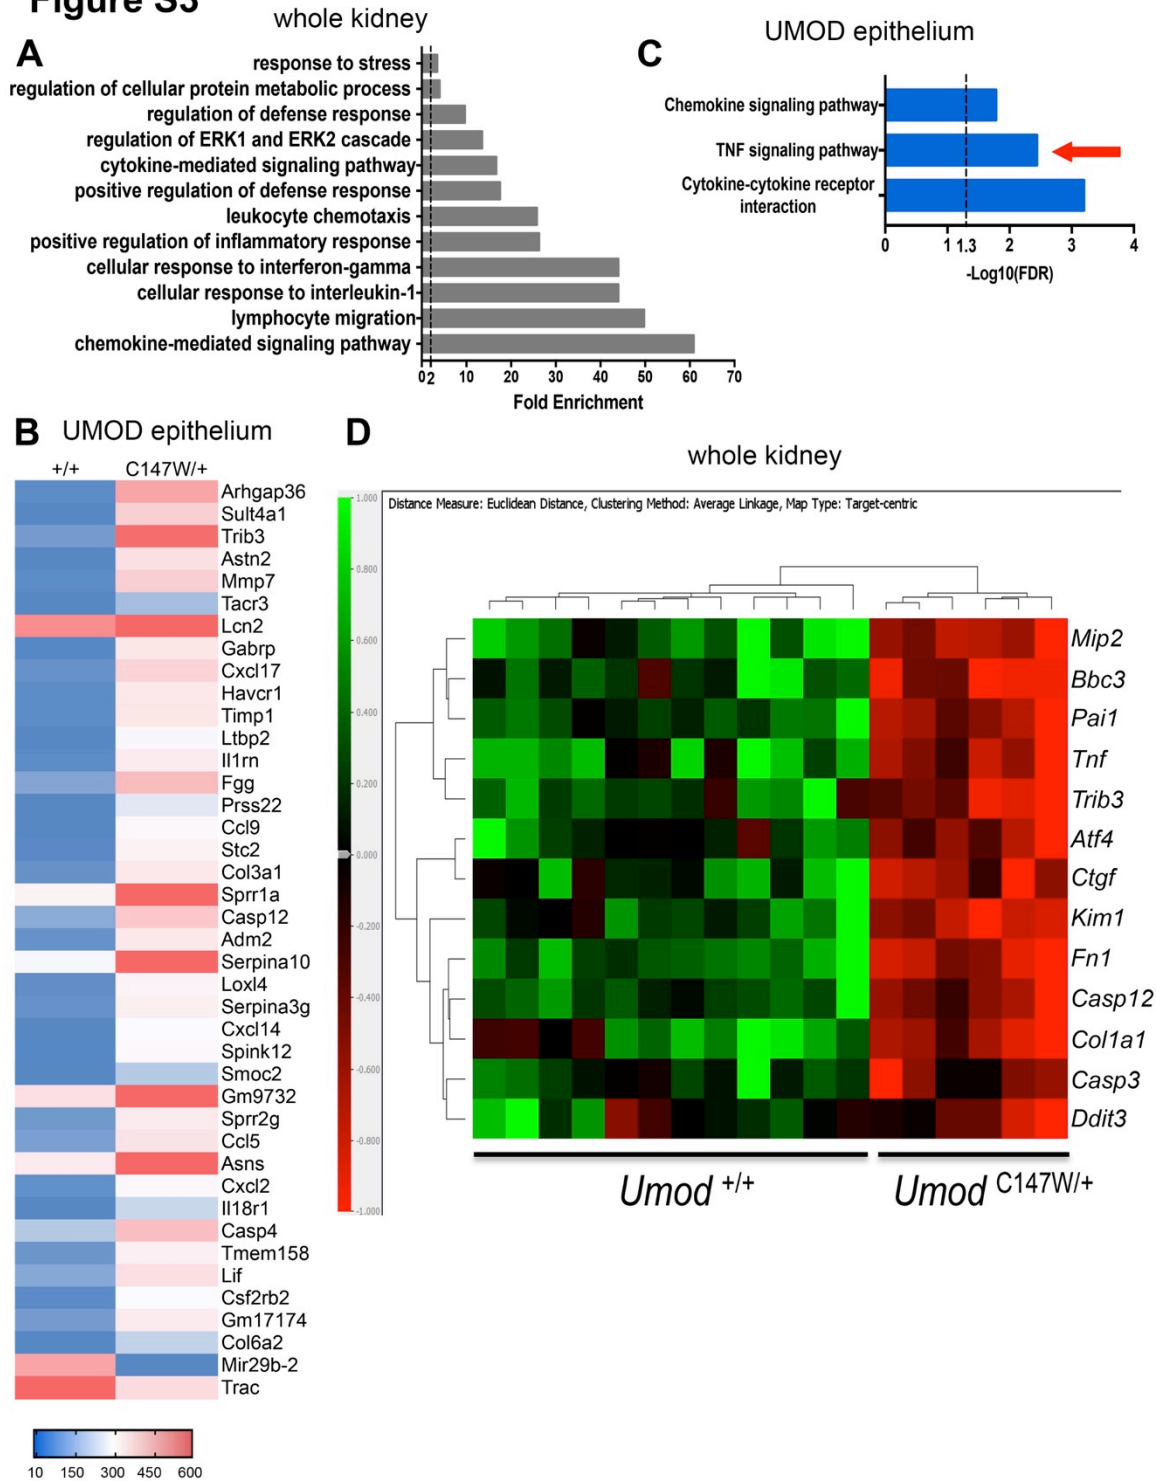

**Figure S3. Transcriptional Analysis of *Umod*<sup>C147W/+</sup> kidneys.**

(A) GO results for biological process analysis from 40 most up-regulated DEGs from RNA from whole kidney isolate of 12-week-old mice kidneys (adjusted p-value <0.05; Fold enrichment >2). (B) Heat map of 40 most upregulated DEGs with adjusted p-value < 0.05 and Log<sub>2</sub>FC>1. RNA isolated from UMOD producing cells from kidney tissue of 12-week –old mice. Scale bar in FPKM. (C) Enriched GO terms (adjusted p-value <0.05) from KEGG pathway analysis of the 40 most upregulated DEGs in RNA isolated from UMOD producing cells from kidney tissue of 12-week –old mice. (D) Heat map representation of q-PCR panel for key genes related to inflammation, fibrosis, apoptosis, UPR, and autophagy. Panel performed on 24-week-old whole kidney RNA isolate. Color-scale (red upregulated, green downregulated, black intermediate expression). n = 8-11 per group.

**Figure S4**

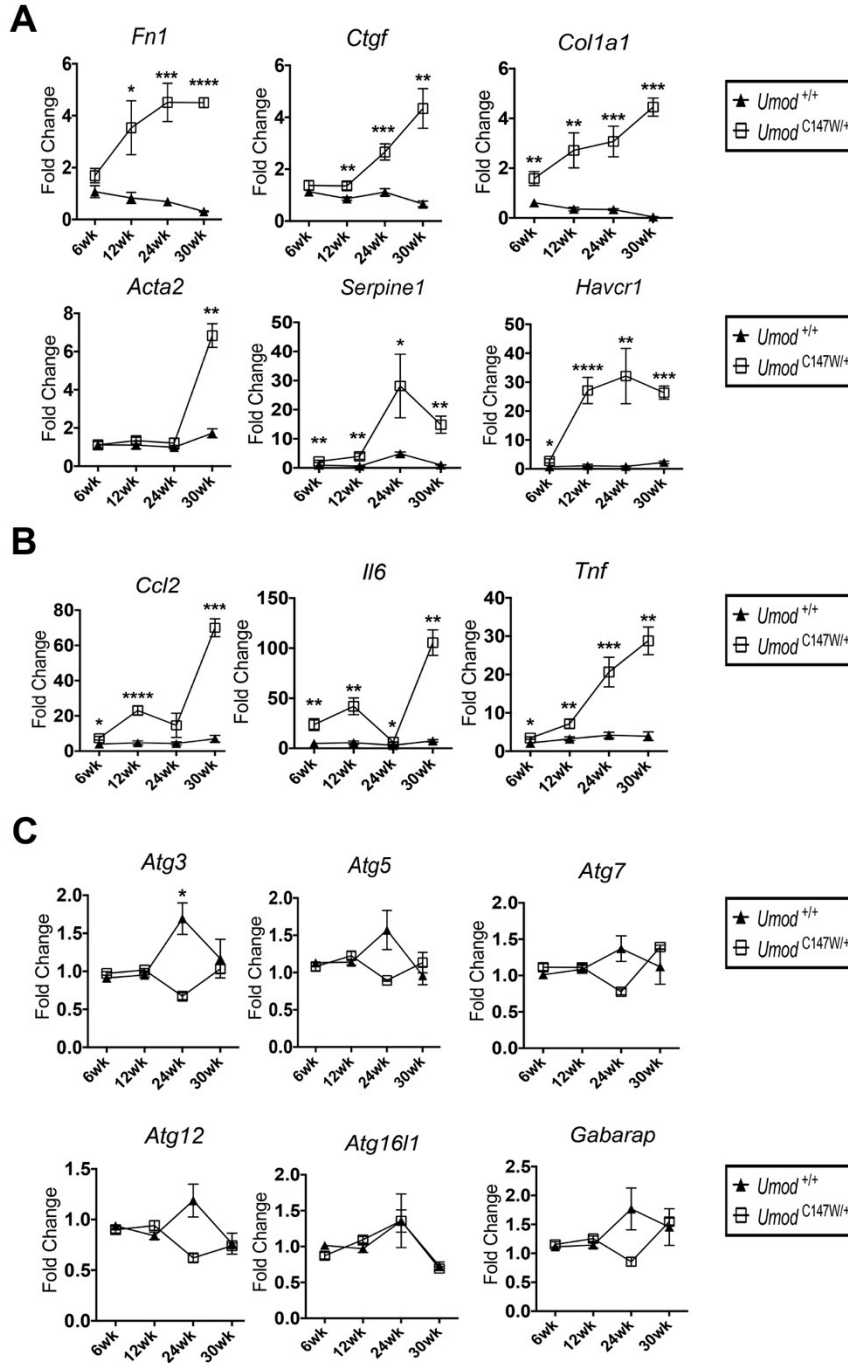

**Figure S4. Time course analysis of transcriptional changes in *Umod*<sup>C147W/+</sup> kidneys.**

(A-B) Quantitative PCR of RNA isolate from whole kidney tissue over time. (A) Fibrosis genes and Kidney Injury Molecule-1 (*Havcr1*). (B) Inflammatory genes. (C) Quantification of additional autophagy related genes by q-PCR from directly isolated UMOD producing primary murine epithelial cells over time. Data are represented as mean  $\pm$  SEM. \*P<0.05, \*\*P<0.01, \*\*\*P<0.001, \*\*\*\*P<0.0001. 2-way ANOVA with post hoc testing. n = 6–8 per group. (Scale bars, 50  $\mu$  m.)

**Figure S5**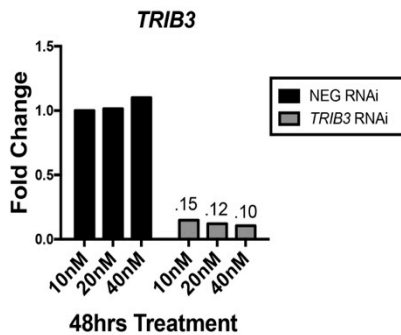**Figure S5. Tribbles-3 (*TRIB3*) silencing in human UMOD producing cells.**

Quantification of expression of *TRIB3* 48hrs following treatment with siRNA; negative control or *TRIB3* (10-40nM). n= 2-3 per condition.



**Figure S6**

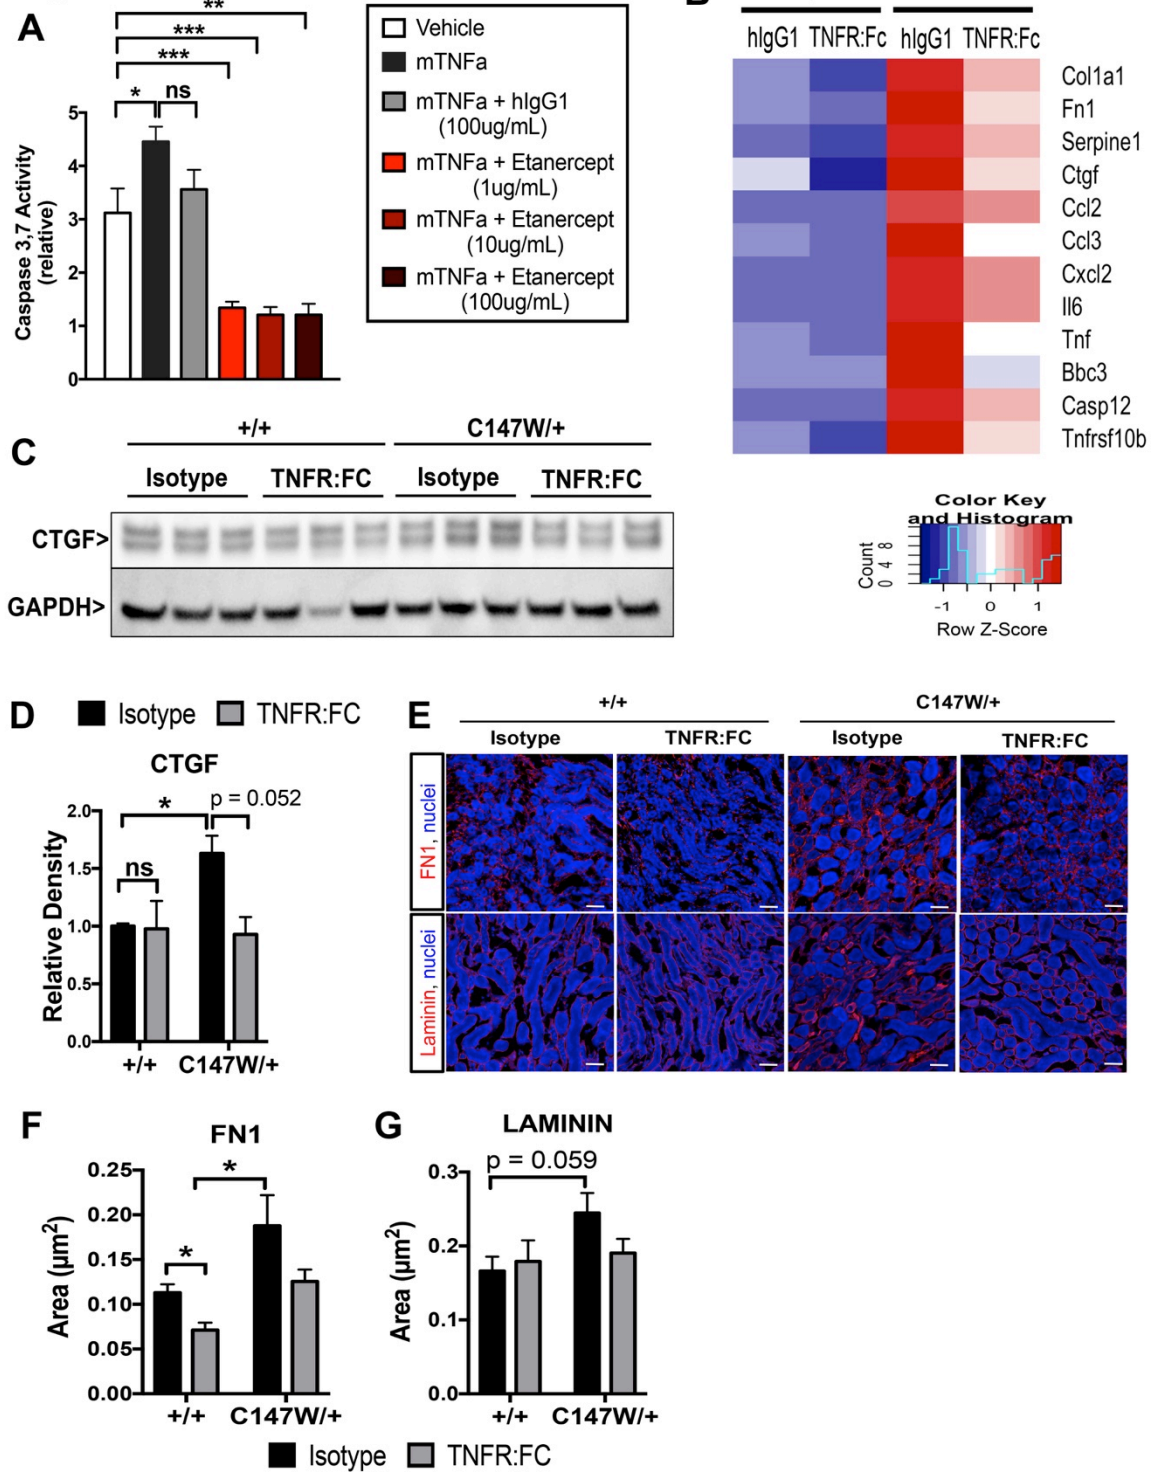

**Figure S6. TNFR:Fc in vitro and in vivo experiments.**

(A) Quantification of caspase-3,7 activity in human UMOD producing cells after 24hrs of treatment with vehicle, TNF $\alpha$  (50ng/mL) +/- hIgG control (100ug/mL) or TNFR:Fc 1, 10, 100 $\mu$ g/mL. n = 3 wells per condition. (B) Heat map of quantitated expression by q-PCR of fibrosis, inflammation, and apoptosis related genes. Scale reflects row Z-score of relative fold change normalized to wild type animals treated with isotype control antibody. (C) Western blot analysis of CTGF from whole kidney isolate of mice at 16 weeks-of-age +/- hIgG or TNFR:Fc. Note: blot from Figure 8B was stripped and re-probed for CTGF. (D) Densitometry of CTGF western blot. Note reduction of CTGF protein (p-value = 0.052) in heterozygous mice treated with TNFR:Fc. (E) Immunofluorescent images taken at 20X of fibronectin and laminin protein in whole kidney tissue sections. (F-G) Quantification of positively stained area ( $\mu\text{m}^2$ ). (F) Fibronectin area. (G) Laminin area. Data are represented as mean  $\pm$  SEM. \*P<0.05, \*\*P<0.01, \*\*\*P<0.001, \*\*\*\*P<.0001. 2-way ANOVA with post hoc testing. n = 4-6 animals per group. (Scale bars, 50  $\mu$  m.)

**Figure S7**

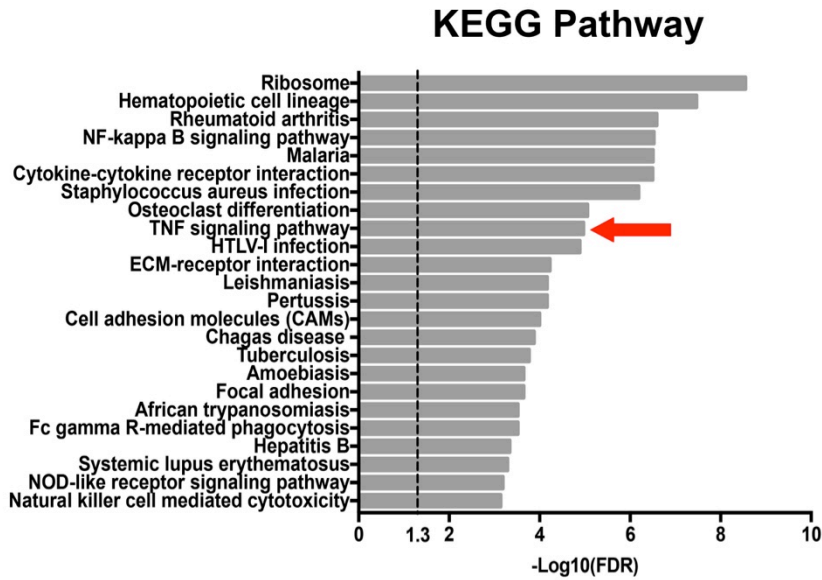

**Figure S7. RNA sequencing of hypertensive and diabetic chronic kidney disease identifies TNF-signaling pathway enriched in upregulated genes compared to healthy matched controls.**

GO results for KEGG pathway analysis from up-regulated DEGs from whole kidney isolate. (adjusted p-value  $<0.05$ ; Fold enrichment  $>5$ ). Note enrichment of TNF signaling pathway.

Figure S8

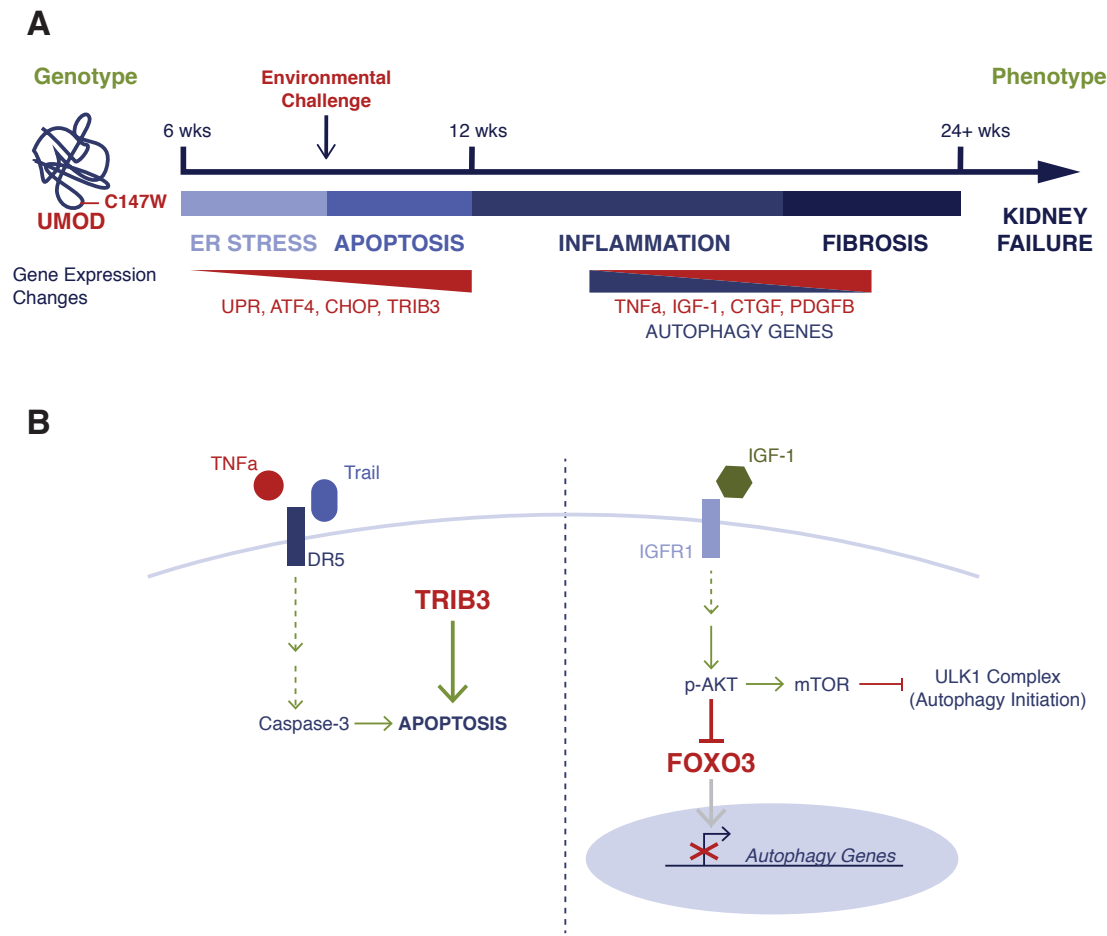

**Figure S8. Mechanism of disease progression.**

(A) Timeline representation of disease progression from genotype to phenotype from 6wk to 24+ weeks. Mutant UMOD p.Cys147Trp protein triggers ER stress and UPR mechanisms, accumulating over time, which results in elevated ATF4, CHOP, TRIB3. Progressive fibrosis reaches peak at 24+weeks, concomitant with kidney failure. (B) Mechanistic representation for tubule apoptosis and autophagy inhibition. Trib3 acts as an intrinsic ER-stress mediated cell death mediator to sensitize UMOD producing tubular cells to TNF and TRAIL-induced apoptosis. Inhibition of autophagy is realized by elevated IGF-1, which positively regulates AKT. This in turn increases negative regulation of FOXO3, maintaining the transcription factor in the cytoplasm, preventing it from inducing expression of autophagy related genes. Active AKT positively regulates mTOR, which in turn inhibits the ULK1 complex, preventing phagophore formation and autophagy initiation.

**2. Supplemental Tables:****Table S1**

| Gene               | Taqman Probe  | Species |
|--------------------|---------------|---------|
| <i>Acta2</i>       | Mm00725412_s1 | Mouse   |
| <i>Atf4</i>        | Mm00515325_g1 | Mouse   |
| <i>Atg10</i>       | Mm00470550_m1 | Mouse   |
| <i>Atg12</i>       | Mm00503201_m1 | Mouse   |
| <i>Atg14</i>       | Mm00553733_m1 | Mouse   |
| <i>Atg16l1</i>     | Mm00513085_m1 | Mouse   |
| <i>Atg3</i>        | Mm00471287_m1 | Mouse   |
| <i>Atg5</i>        | Mm00504340_m1 | Mouse   |
| <i>Atg7</i>        | Mm00512209_m1 | Mouse   |
| <i>Bbc3 (Puma)</i> | Mm00519268_m1 | Mouse   |
| <i>Bcl2</i>        | Mm00477631_m1 | Mouse   |
| <i>Bcl2l1</i>      | Mm00437783_m1 | Mouse   |
| <i>Becn1</i>       | Mm01265461_m1 | Mouse   |
| <i>Casp12</i>      | Mm00438038_m1 | Mouse   |
| <i>Casp3</i>       | Mm01195085_m1 | Mouse   |
| <i>Casp6</i>       | Mm01321726_g1 | Mouse   |
| <i>Casp7</i>       | Mm00432322_m1 | Mouse   |
| <i>Casp8</i>       | Mm00802247_m1 | Mouse   |

|                        |               |       |
|------------------------|---------------|-------|
| <i>Ccl2 (Mcp1)</i>     | Mm00441242_m1 | Mouse |
| <i>Ccl3 (Mip1a)</i>    | Mm00441259_g1 | Mouse |
| <i>Colla1</i>          | Mm00801666_g1 | Mouse |
| <i>Ctgf</i>            | Mm01192932_g1 | Mouse |
| <i>Cxcl2 (Mip2)</i>    | Mm00436450_m1 | Mouse |
| <i>Ddit3</i>           | Mm01135937_g1 | Mouse |
| <i>Fn1</i>             | Mm01256744_m1 | Mouse |
| <i>Gabarap</i>         | Mm00490680_m1 | Mouse |
| <i>Gabarapl1</i>       | Mm00457880_m1 | Mouse |
| <i>Gabarapl2</i>       | Mm01243684_gH | Mouse |
| <i>Gadd34</i>          | Mm01205601_g1 | Mouse |
| <i>Gapdh</i>           | Mm99999915_g1 | Mouse |
| <i>Havcr1 (Kim1)</i>   | Mm00506686_m1 | Mouse |
| <i>Hspa5 (Bip)</i>     | Mm00517691_m1 | Mouse |
| <i>Igf1</i>            | Mm00439560_m1 | Mouse |
| <i>Il1b</i>            | Mm00434228_m1 | Mouse |
| <i>Il6</i>             | Mm00446190_m1 | Mouse |
| <i>Kcnj1 (Romk)</i>    | Mm00444727_s1 | Mouse |
| <i>Map1lc3b</i>        | Mm00782868_sH | Mouse |
| <i>Nbr1</i>            | Mm01249798_m1 | Mouse |
| <i>Pdgfb</i>           | Mm00440677_m1 | Mouse |
| <i>Rab7a</i>           | Mm00784318_sH | Mouse |
| <i>Rragc</i>           | Mm00600306_m1 | Mouse |
| <i>Serpine1 (Pai1)</i> | Mm00435858_m1 | Mouse |
| <i>Sqstm1 (P62)</i>    | Mm00448091_m1 | Mouse |
| <i>Tnf</i>             | Mm00443258_m1 | Mouse |
| <i>Tnfrsf10b (Dr5)</i> | Mm00457866_m1 | Mouse |
| <i>Tnfsf10 (Trail)</i> | Mm01283606_m1 | Mouse |
| <i>Trib3</i>           | Mm00454879_m1 | Mouse |
| <i>Umod</i>            | Mm00447649_m1 | Mouse |
| <i>Vps11</i>           | Mm01168594_m1 | Mouse |
| <i>Vps18</i>           | Mm00552119_m1 | Mouse |
| <i>Vps26a</i>          | Mm00446695_m1 | Mouse |
| <i>Vps33a</i>          | Mm00513189_m1 | Mouse |
| <i>Vps35</i>           | Mm00458167_m1 | Mouse |
| <i>ATF4</i>            | Hs00909569_g1 | Human |
| <i>ATG10</i>           | Hs00919718_m1 | Human |
| <i>ATG12</i>           | Hs01047860_g1 | Human |
| <i>ATG3</i>            | Hs00223937_m1 | Human |
| <i>BBC3</i>            | Hs00248075_m1 | Human |
| <i>DDIT3 (CHOP)</i>    | Hs00358796_g1 | Human |

|                        |               |       |
|------------------------|---------------|-------|
| <i>GABARAP</i>         | Hs00925899_g1 | Human |
| <i>GAPDH</i>           | Hs02758991_g1 | Human |
| <i>HAVCR1 (KIM1)</i>   | Hs00930379_g1 | Human |
| <i>HSPA5 (BIP)</i>     | Hs00607129_gH | Human |
| <i>KCNJ1 (ROMK)</i>    | Hs00165012_m1 | Human |
| <i>MAP1LC3B</i>        | Hs00797944_s1 | Human |
| <i>NBR1</i>            | Hs00245918_m1 | Human |
| <i>SLC12A1 (NKCC2)</i> | Hs00165731_m1 | Human |
| <i>SQSTM1</i>          | Hs01061917_g1 | Human |
| <i>TNF</i>             | Hs00174128_m1 | Human |
| <i>TNFRSF10B (DR5)</i> | Hs00366278_m1 | Human |
| <i>TNFSF10 (TRAIL)</i> | Hs00921974_m1 | Human |
| <i>TRIB3</i>           | Hs01082394_m1 | Human |
| <i>UMOD</i>            | Hs00358451_m1 | Human |

### 3. Supplemental Experimental Procedures:

#### Characterization and therapeutic outcome study of Umod<sup>C147W/+</sup> line

Initial phenotyping was performed using 4 male and 4 female mice totaling 8/group for wild type and heterozygous cohorts at 6,12, and 24 weeks-of-age. Three wild type and three heterozygous male mice were assessed at 30 weeks-of-age. Littermate controls were used to mitigate any minor genetic variations. Timed urine collection, blood draw, and body weight were collected and assessed at each time point as described previously (1). For the therapeutic outcome study using TNF inhibition, soluble TNFR:Fc (Etanercept) was injected twice weekly IP from week 10 to week 16 (10mg/kg) in cohorts of sex-matched heterozygous mutant or wild type mice. An irrelevant, isotype matched control IgG antibody specific for Hen egg lysozyme (10mg/kg) was used in the control group (2, 3). These antibodies have been shown not to stimulate immune responses in rodent experimentation (2-5). For all experiments, Blood Urea Nitrogen (BUN) (Pointe Scientific) and Creatinine (Diazyme Laboratories) in sera, as well as Creatinine and u-Albumin (Exocell) in urine were assessed using colorimetric enzyme or ELISA assays at each time point as described (1). Specific gravity of urine of 24-week-old animals was measured using Siemens Healthineers Multistix and Uristix Reagent Strips (Fisher),

according to manufacturer's protocol. Tissues were processed in PLP fixative and Formalin for histology. Tissue for RNA was preserved in RNAlater (Invitrogen), or snap-frozen in liquid nitrogen for protein analysis, as described (6).

### **Histology**

Kidneys were resected after systemic perfusion with sterile, ice-cold PBS. Paraffin-embedded sections of kidney fixed with neutral-buffered formalin were used for periodic acid–Schiff (PAS), Masson's trichrome, and picrosirius red staining. Quantification of collagen deposition and fibrosis index were performed as described (7). Briefly, 10X images were taken across the entirety of the kidney section and positive signal intensity for picrosirius and Masson's trichrome staining were independently quantified using MATLAB software.

### **Immunofluorescence detection and evaluation**

Mouse tissues and human cells were prepared and stained as described (8). Briefly, kidneys were fixed in PLP solution for 2 hours and washed in 18% sucrose solution overnight prior to cryopreservation and cryosectioning (7  $\mu$ m). For antigen detection by fluorescence, primary antibodies against the following proteins were used for immunolabeling: Uromodulin (1:50, R&D, MAB5175, clone # 774056), Calnexin (1:200, Abcam, ab22595), Cleaved-Caspase-3 (1:400, Cell Signaling Technology, 9664, clone # 5A1E), Fibronectin (1:400, Abcam, ab6584), Laminin (1:400, Abcam, ab11575). Tissue sections were incubated with either Alexa Fluor 488 or Alexa Fluor 594 affinity purified secondary antibody (Jackson ImmunoResearch, 1:400) for 1 hour at room temperature and post-fixed with 1% paraformaldehyde/PBS. Samples were mounted in ProLong Gold reagent with DAPI (Thermo Scientific). Images were captured by confocal (Zeiss L710) as described (7).

### **Quantitative PCR**

Total RNA was extracted from cells or whole tissue using RNeasy Plus Mini Kit (Qiagen). Purity was determined by A260 to A280 ratio. cDNA was synthesized using



oligo(dT) and random primers (iScript Reverse Transcription Supermix, Biorad). Quantitative PCR was performed using QuantStudio™ 7 Flex Real-Time PCR System (Life Technologies) using the TaqMan® Gene Expression Assays (Life Technologies). The specific primer pairs used in Q-PCR are listed in Table S1. For *Xbp1* sliced and unspliced isoform detection, a custom Taqman primer-probe set was synthesized according to the sequences described (9). The primer sequences are as follows (nucleotide difference between *Xbp1s* and *Xbp1u* in bold): Forward 5'-CTGAGTCCGCAGCAG**GGT**-3' (*Xbp1s*), 5'-CTGAGTCCGCAGCA**CTCAGA**-3' (*Xbp1u*); Reverse 5'-**TGTC**AGAGTCCATGGGAAGA-3' (*Xbp1s*), 5'-TCAGAGTCCATGGGAAGAT**GTTC**-3' (*Xbp1u*); (FAM-probe): 5'-**GGCCCAGTTGTCACCTCCCC**-3' (*Xbp1s*), 5'-**CTATGTGCACCTCTGC**-3' (*Xbp1u*).

### Protein isolation and western blotting

Cultured cells and snap-frozen kidney were lysed in ice-cold RIPA cell lysis buffer (Boston Bioproducts) with HALT protease and phosphatase inhibitor cocktail (Thermo Scientific), using the Omni Bead Ruptor to homogenize tissue. Samples were centrifuged for 5 minutes at 14,000 g, and the supernatant was taken for protein determination. Cell extracts containing 15µg protein were prepared in SDS sample buffer and subjected to SDS-PAGE. After transfer to nitrocellulose paper and blocking, immunostaining was performed in TBST buffer. The following antibodies were used to detect the specific proteins: Uromodulin (1:500, R&D, MAB5175, clone # 774056), Laminin (1:1000, Abcam, ab11575), Fibronectin (1:2000, Abcam, ab6584), Kim1 (1:1000, Abcam, ab47635), Pai1 (1:1000, Abcam, ab66705), CTGF (1:1000, Novus Biologicals, NBP2-16025), aSMA (1:1000, Abcam, ab32575, clone # E184), CHOP (1:1000, Cell Signaling Technology, 5554S, clone # D46F1), CREB2 (1:200, Santa Cruz, sc-22800), TRIB3 (1:500, Santa Cruz, sc-34211), Caspase-12 (1:1000, Abcam, ab62484), Cleaved-Caspase-3 (1:500, Cell Signaling Technology, 9664, clone # 5A1E), p-Foxo3a (1:1000, Abcam, ab62484, clone # EPR1951(2)), Foxo3a (1:1000, Cell Signaling Technology, 12829, clone # D19A7), p-AKT (1:1000, Cell Signaling Technology, 4060, clone # D9E), AKT (1:1000, Cell Signaling Technology, 4685, clone # 11E7), p-mTOR (1:1000, Cell

Signaling Technology, 5536, clone # D9C2), p-ULK1 Ser757 (1:1000, Cell Signaling Technology, 6888), p-TFEB (1:10000, Millipore, ABE1971), SQSTM1/P62 (1:1000, Cell Signaling Technology, 12829), LC3B (1:1000, Novus Biologicals, NB100-2220) and Gapdh (1:1000, Santa Cruz, sc-20357). Bound primary antibodies were labeled with HRP-conjugated anti-rabbit or anti-mouse IgG antisera (1:3000, GE Healthcare), or anti-rat (1:3000, Thermo Scientific) or anti-goat (1:10,000, Thermo Scientific). Positive bands were detected by enhanced chemiluminescence (ECL, Pierce; SuperSignal West Dura, Thermo Scientific), and luminescence was captured by the ChemiDoc MP Imaging System (Bio-Rad). Blots were stripped with Restore buffer (Thermo Scientific) and re-probed for GAPDH. Densitometry quantification was performed in ImageJ software.

### **RNA sequencing and bioinformatics analysis**

RNA was isolated directly from whole kidney and UMOD producing cell samples homogenized in RLT buffer and purified using RNeasy Plus Mini Kit (Qiagen). RNA quality was assessed using a Bioanalyzer (Agilent Technologies). The library preparation was done using TruSeq® Stranded mRNA Sample preparation kit (Illumina inc). The starting material (100 ng) of total RNA was mRNA enriched using the oligodT bead system. The isolated mRNA was subsequently fragmented using enzymatic fragmentation. Then first strand synthesis and second strand synthesis were performed and the double stranded cDNA was purified (AMPure XP, Beckman Coulter). The cDNA was end repaired, 3' adenylated and Illumina sequencing adaptors ligated onto the fragments ends, and the library was purified (AMPure XP). The mRNA-stranded libraries were pre-amplified with PCR and purified (AMPure XP). The libraries size distribution was validated and quality inspected on a Bioanalyzer high sensitivity DNA chip (Agilent Technologies). High quality libraries were quantified using qPCR, the concentration normalized and the samples pooled according to number of reads. The library pool(s) were re-quantified with qPCR and optimal concentration of the library pool used to generate the clusters on the surface of a flowcell before sequencing on HiSeq2500 instrument using hiSeq v.4 reagents (51 cycles). 30 million reads (50bp single-end reads) were generated and mapped onto Mus musculus reference genome GRCm38, with annotation reference Ensembl\_70. Tophat (v2.0.11) and Bowtie2 (v.2.2.2) were used to

align sequence reads to the reference genome. Cufflinks (v.2.2.1) was used to convert aligned sequences into transcripts, providing map of transcriptome. Fragment bias correction was performed as described (10). Cuffdiff was used to calculate the FPKM (number of fragments per kilobase per million mapped fragments) and test for differential expression and regulation among the assembled transcripts across the submitted samples using the Cufflinks output. KEGG pathway analysis and biological process were performed using STRING (v10.0 String Consortium 2016) on the top 40 differentially expressed genes with  $FDR < 0.05$  and  $\text{Log}_2FC > 1$ . Biological process gene ontology enrichment analysis was also performed using open source software from the Gene Ontology Consortium, as a second means of verification. To analyze for transcription factor activity, Whole Genome RVista was used (genome.lbl.org). Detailed RNAseq information including access to raw data, meeting Minimum Information About a Microarray Experiment (MIAME) requirements, has been deposited in the NCBI's Gene Expression Omnibus (GSE102566).

## **Cell purification, culture, and assays**

### ***Purification of cells from kidney***

Mouse UMOD producing epithelial cell purification was performed by preparing single cell digest from normal and diseased mouse kidney, as described (7, 11), with modifications. Briefly, kidneys were decapsulated, minced, and then incubated in a shaking water bath (180 rpm) at 37°C for 50 min with Liberase DL (0.5mg/mL; Roche) and DNase (100U/mL; Roche) in serum-free DMEM/F12. After incubation, enzymatic digestion was halted by addition of 1 volume (2mLs) of DMEM/F12 with 10% serum. The tissue digest was mixed thoroughly and filtered (40 $\mu$ M).

UMOD producing cells were separated from the single cell suspension using the Dynabead magnetic bead conjugation system, whereby biotinylated, mouse anti-UMOD monoclonal antibody (R&D: BAF5175) was incubated with Dynabeads Biotin Binder (Thermo Fisher). For each kidney isolate, 100 $\mu$ L beads were conjugated with 6 $\mu$ g anti-UMOD antibody at 4°C for 45min. Beads were then washed twice with MACS buffer, and incubated with the single cell suspension in a final volume of 1mL at 4°C for 45min. Beads and UMOD cells were then trapped against a magnet, and residual UMOD-

negative cells were washed away. UMOD cell positive fractions were divided and harvested immediately for RNA in RLT buffer (Qiagen) with 2-mercaptoethanol (Sigma), or for protein analysis in RIPA Buffer (Boston Bioproducts) with 2X Halt Protease and Phosphatase buffer (Thermo Scientific). Murine LTL+ proximal tubule cells were isolated from the UMOD negative fraction, as a negative control, in the same manner described above with use of Biotinylated LTL (Vector Laboratories, 2ug LTL/5uL Dynabead suspension). UMOD producing cells were isolated from discarded human kidney from nephrectomies performed at Tufts New England Medical Center (Boston, MA). The procedure is identical to that for mouse listed above, with the exception of the antibody for isolation being biotinylated, human-UMOD monoclonal antibody (R&D: BAF5144). LTL+ proximal tubule cells and then EPCAM+ cells were sequentially isolated from the remaining UMOD negative fraction as controls. LTL+ cells were isolated using Biotin Binder Dynabeads and Biotinylated LTL (Vector Laboratories, B-1325) (2ug LTL/5uL Dynabead suspension), as described above. EPCAM+ cells were isolated using CD326 (EpCAM) MicroBeads (Miltenyi Biotec) and MACS LS columns (Miltenyi Biotec), as previously described (8). A fraction of each of the human UMOD producing, LTL+, and EPCAM+ cell isolates were immediately harvested for RNA in RLT buffer (Qiagen), and the remainder were cultured and maintained as independent cultures in complete Renal Epithelial Growth Medium (REGM, Lonza).

### ***Transgenic expression and gene silencing in vitro***

Stable expression of mutant p.Cys147Trp and wild type UMOD, driven under the CMV promoter, was established in human UMOD positive cells using lentiviral vectors purchased from GeneCopoeia. Positive selection of transduced cells was achieved with puromycin treatment at 1µg/mL. The human, transgenic UMOD cell populations were immortalized with transduction with a CMV-temperature sensitive SV40 TAg viral vector. Human cell lines of each transgenic primary culture were established and maintained at 33°C, and cultured for 48hrs at 37°C to equilibrate prior to experimentation.

### ***Autophagy-flux detection assay***

Uromodulin positive human tubule cells expressing UMOD p.Cys147Trp mutation were plated at 35,000 cells per well in a black, clear bottom 96-well plate, and transduced with Premo Autophagy Tandem Sensor LC3B-GFP-RFP BacMam 2.0 virus (Thermo Scientific) according to the vendor's protocol for 24hrs. Cells were then treated with 0.1% DMSO (Sigma), 12.5-50nM Rapamycin (Sigma), or 5-20uM Torkinib (Selleckchem) in Opti-Mem (Thermo Scientific). Fluorescent (Red/Green) and phase contrast images (4 images per well) were captured using a commercially available imaging system (Incucyte ZOOM, Essen BioScience, Ann Arbor, MI, USA) at 6 and 12 hrs post treatment, and quantification for percent loss of LC3B-GFP-RFP overlap signal was performed.

### ***Apoptosis detection assay and ER stress induction***

Uromodulin primary human p.Cys147Trp mutant or wild type cells were plated at 50,000 cells per well in a black, clear bottom 96-well plate, and cultured for 16hrs in growth media. Cells were then transfected with non-targeting control, or TRIB3 siRNA as described above. After 24hrs, cells were pulsed for 4 hours with 10ug/mL Brefeldin A (Cell Signaling Technology) to simulate an ER-stress insult. Cells were then allowed to recover in growth media for 20 hours. After recovery, cells were stimulated with 50ng/mL TNF $\alpha$  (Life Technologies) or 50ng/mL TRAIL (Gibco) in Opti-Mem. CellEvent Caspase-3/7 Green ReadyProbes Reagent (Thermo Scientific) was included in the vehicle and cytokine treatments as per supplier's instructions (2 drops/mL). Upon cytokine treatment, wells were imaged at 4 images per well over 24 hours with the Incucyte ZOOM imaging system. The number of positive, cleaved caspase-3,7 puncta per image was quantified over 24 hours.

## **4. Supplemental References:**

1. Gomez IG, MacKenna DA, Johnson BG, Kaimal V, Roach AM, Ren S, Nakagawa N, Xin C, Newitt R, Pandya S, et al. Anti-microRNA-21 oligonucleotides prevent Alport nephropathy progression by stimulating metabolic pathways. *The Journal of clinical investigation*. 2015;125(1):141-56.

2. Xia Y, Campbell SR, Broder A, Herlitz L, Abadi M, Wu P, Michaelson JS, Burkly LC, and Putterman C. Inhibition of the TWEAK/Fn14 pathway attenuates renal disease in nephrotoxic serum nephritis. *Clinical immunology*. 2012;145(2):108-21.
3. Fernandez-Laso V, Sastre C, Mendez-Barbero N, Egido J, Martin-Ventura JL, Gomez-Guerrero C, and Blanco-Colio LM. TWEAK blockade decreases atherosclerotic lesion size and progression through suppression of STAT1 signaling in diabetic mice. *Scientific reports*. 2017;7(46679).
4. Abdul-Hamid M, Ahmed RR, Moustafa N, and Nady R. The antifibrogenic effect of etanercept on development of liver cirrhosis induced by thioacetamide in rats. *Ultrastructural pathology*. 2017;41(1):23-35.
5. Nakagawa H, Umemura A, Taniguchi K, Font-Burgada J, Dhar D, Ogata H, Zhong Z, Valasek MA, Seki E, Hidalgo J, et al. ER stress cooperates with hypernutrition to trigger TNF-dependent spontaneous HCC development. *Cancer cell*. 2014;26(3):331-43.
6. Ren S, Johnson BG, Kida Y, Ip C, Davidson KC, Lin SL, Kobayashi A, Lang RA, Hadjantonakis AK, Moon RT, et al. LRP-6 is a coreceptor for multiple fibrogenic signaling pathways in pericytes and myofibroblasts that are inhibited by DKK-1. *Proceedings of the National Academy of Sciences of the United States of America*. 2013;110(4):1440-5.
7. Ren S, Johnson BG, Kida Y, Ip C, Davidson KC, Lin SL, Kobayashi A, Lang RA, Hadjantonakis AK, Moon RT, et al. LRP-6 is a coreceptor for multiple fibrogenic signaling pathways in pericytes and myofibroblasts that are inhibited by DKK-1. *Proceedings of the National Academy of Sciences of the United States of America*. 2013;110(4):1440-5.
8. Gomez IG, MacKenna DA, Johnson BG, Kaimal V, Roach AM, Ren S, Nakagawa N, Xin C, Newitt R, Pandya S, et al. Anti-microRNA-21 oligonucleotides prevent Alport nephropathy progression by stimulating metabolic pathways. *The Journal of clinical investigation*. 2015;125(1):141-56.
9. Hayashi A, Kasahara T, Iwamoto K, Ishiwata M, Kametani M, Kakiuchi C, Furuichi T, and Kato T. The role of brain-derived neurotrophic factor (BDNF)-induced XBP1 splicing during brain development. *The Journal of biological chemistry*. 2007;282(47):34525-34.
10. Hansen KD, Brenner SE, and Dudoit S. Biases in Illumina transcriptome sequencing caused by random hexamer priming. *Nucleic acids research*. 2010;38(12):e131.
11. Schrimpf C, Xin C, Campanholle G, Gill SE, Stallcup W, Lin SL, Davis GE, Gharib SA, Humphreys BD, and Duffield JS. Pericyte TIMP3 and ADAMTS1 modulate vascular stability after kidney injury. *Journal of the American Society of Nephrology : JASN*. 2012;23(5):868-83.
